# Supplementary material
Source: PubMed Central journal article supplement (PMC3683648)
Supplement: NIHMS463096-supplement-Supplement.pdf [file NIHMS463096-supplement-Supplement.pdf]

Figure S1

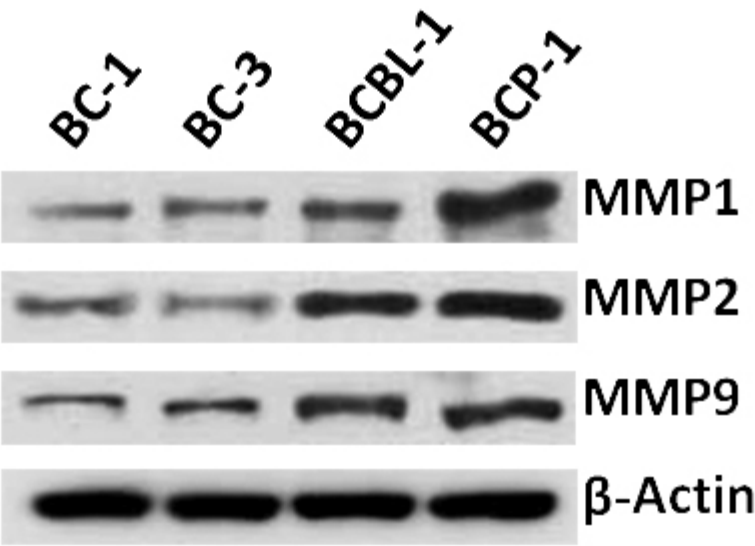

Figure S2

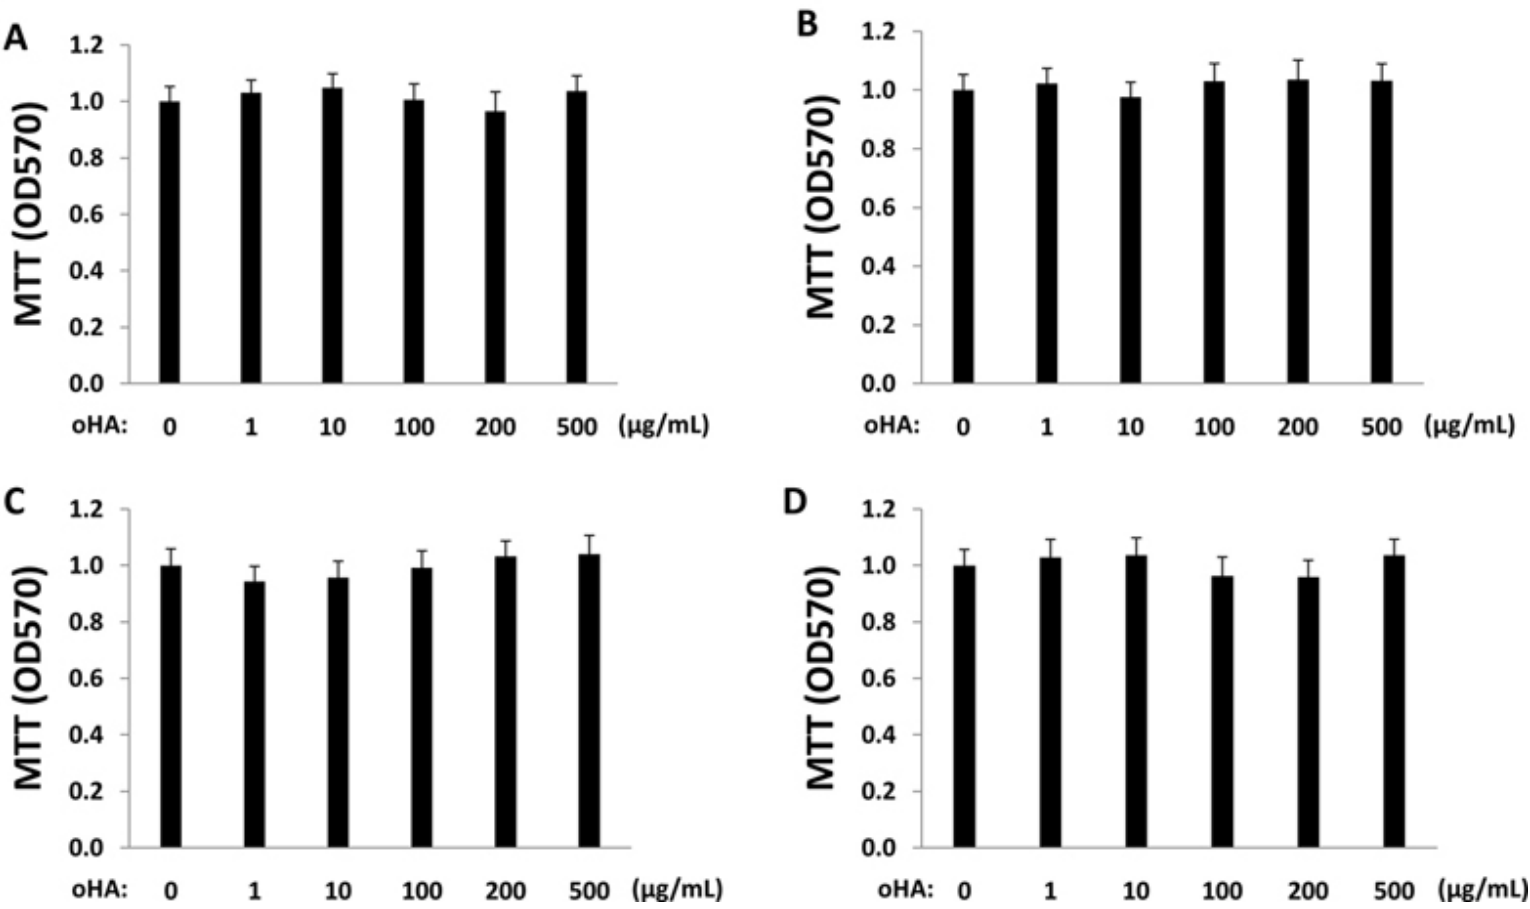

Figure S3

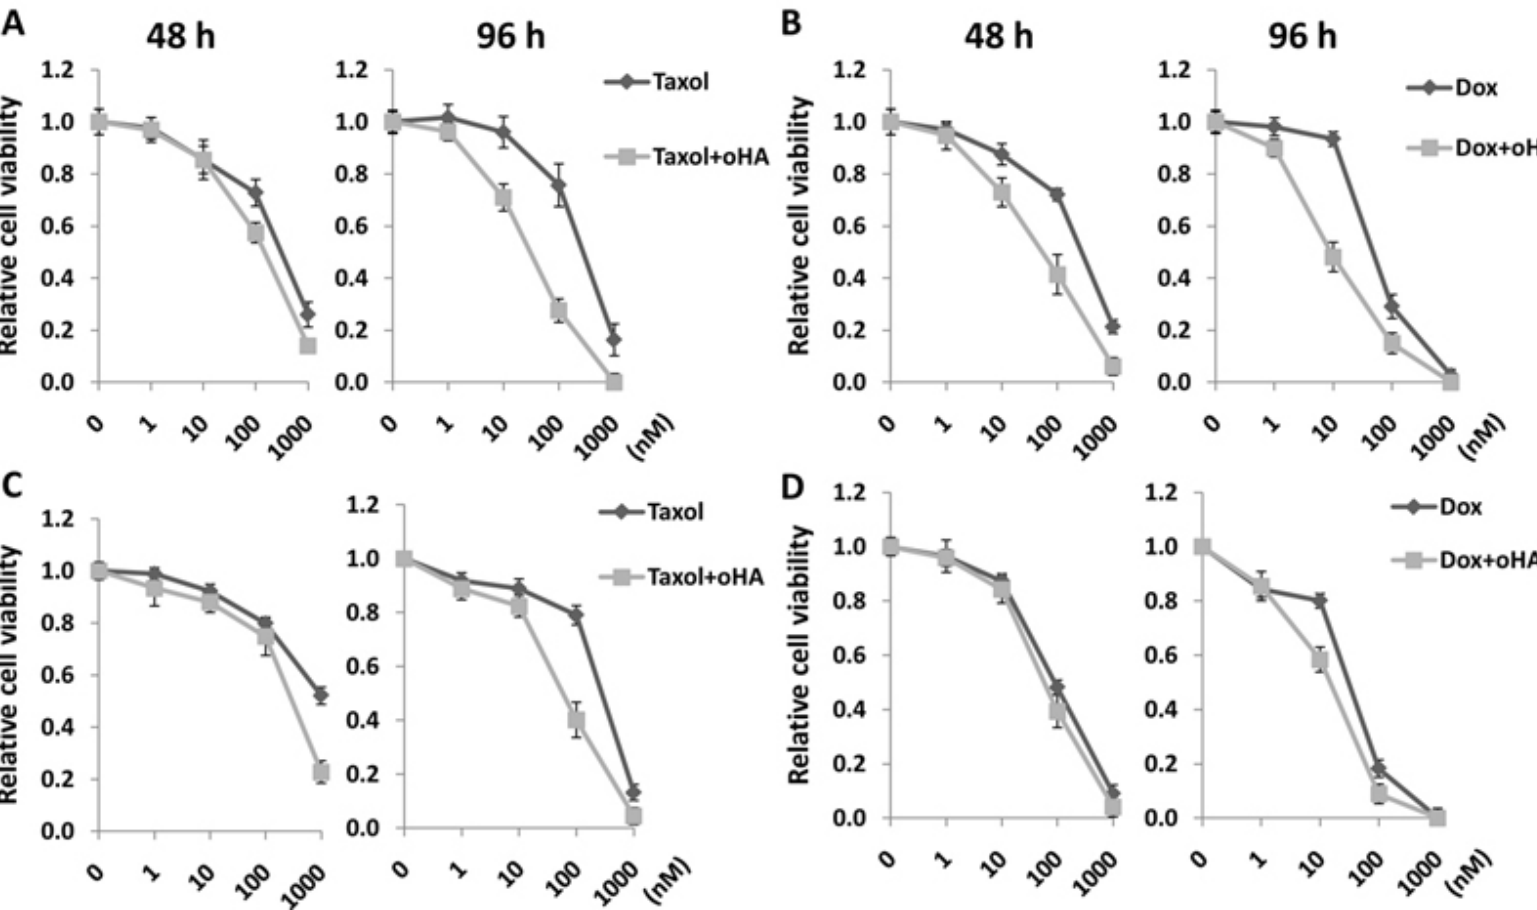

Figure S4

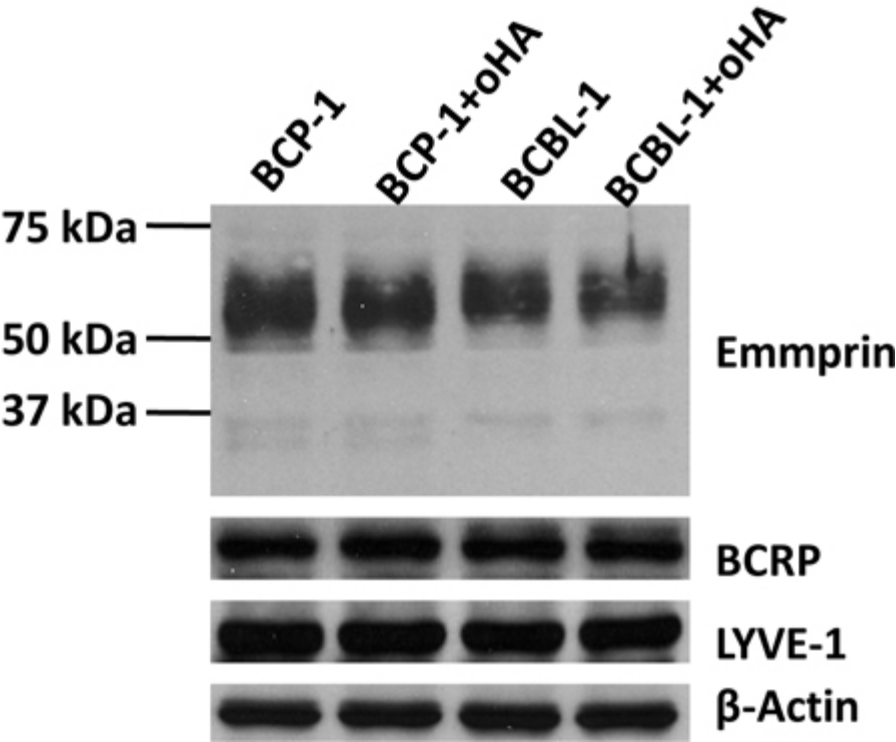

Figure S5

IP: Anti-LYVE-1

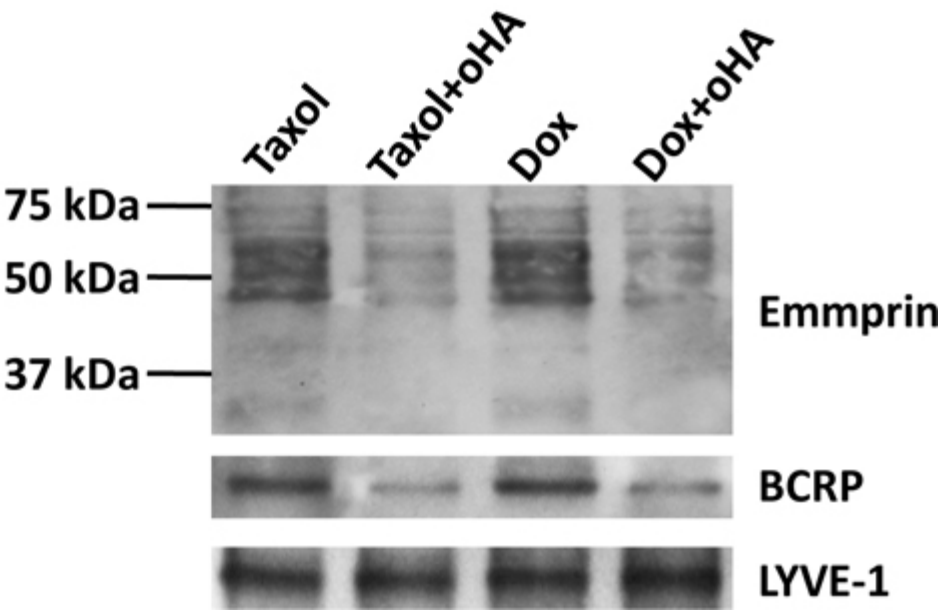

**Supplemental Figure 1. Chemoresistant PEL cells exhibit greater expression of emmprin-associated MMPs.**

Immunoblot analyses were used to detect basal expression of MMP1, MMP2 and MMP9 for both chemosensitive (BC-1 and BC-3) and chemoresistant (BCP-1 and BCBL-1) PEL cells.  $\beta$ -Actin was identified for internal controls. Data shown represent one of three independent experiments.

**Supplemental Figure 2. oHA alone do not induce PEL cytotoxicity.** BC-1 (A), BC-3 (B), BCP-1 (C) and BCBL-1 (D) were incubated with the indicated concentrations of oHA for 96 h and cell viability determined using a standard MTT assay according to the manufacturer's instructions and confirmed by trypan blue exclusion (data not shown). Error bars represent the S.E.M. for three independent experiments.

**Supplemental Figure 3. oHA enhance cytotoxicity for chemosensitive PEL cells in the presence of chemotherapeutic agents.** BC-1 (A-B) and BC-3 (C-D) were incubated with either Taxol or Dox at the indicated concentrations and for the indicated times in the presence or absence of 100 $\mu$ g/mL oHA. Relative cell viability was quantified using trypan blue exclusion as described in Methods. Error bars represent the S.E.M. for three independent experiments.

**Supplemental Figure 4. oHA alone do not affect expression of emmprin, LYVE-1, or BCRP in PEL cells.** BCP-1 and BCBL-1 cells were incubated in the presence or absence of 100 $\mu$ g/mL oHA for 96 h, then immunoblot analyses were used to detect total protein expression, including  $\beta$ -Actin for internal controls. Data shown represent one of three independent experiments.

**Supplemental Figure 5. oHA reduce interaction of emmprin and BCRP with LYVE-1 in PEL cells treated with chemotherapeutic agents.** BCP-1 cells were incubated with 100nM Taxol or 100nM Dox for 48 h in the presence or absence of 100 $\mu$ g/mL oHA. Co-IP assays were then performed as described in Methods.
